# Smart utilization of betaine lipids in giant clam *Tridacna*

## *crocea*

1 Ryuichi Sakai<sup>1\*</sup>, Naoko Goto-Inoue<sup>2</sup>, Hiroshi Yamashita<sup>3\*</sup>, Naoya Aimoto<sup>1</sup>, Yuto Kitai<sup>1</sup>,  
2 Tadashi Maruyama<sup>4</sup>

3 <sup>1</sup>Faculty and Graduate School of Fisheries Sciences, Hokkaido University, 3-1-1 Minato-cho,  
4 Hakodate, 041-8611, Japan

5 <sup>2</sup>Department of Marine Science and Resources, College of Bioresource Sciences, Nihon  
6 University, 1866 Kameino, Fujisawa, Kanagawa 252-0880, Japan

7 <sup>3</sup>Fisheries Technology Institute, Japan Fisheries Research and Education Agency, 148  
8 Fukai-Ohta, Ishigaki, Okinawa 907-0451, Japan

9 <sup>4</sup>School of Marine Biosciences, Kitasato University, 1-15-1, Kitazato, Minami, Sagami-hara,  
10 Kanagawa 252-0374, Japan

11

12 \* Corresponding Authors:

13 Ryuichi Sakai, [ryu.sakai@fish.hokudai.ac.jp](mailto:ryu.sakai@fish.hokudai.ac.jp)

14 3-1-1 Minato-cho, Hakodate, Hokkaido 041-8611, Japan

15 Hiroshi Yamashita, [yamashita\\_hiroshi21@fra.go.jp](mailto:yamashita_hiroshi21@fra.go.jp)

16 148 Fukai-Ohta, Ishigaki, Okinawa 907-0451, Japan

17

18

19 **Author Contributions:**

20 RS, HY, NGI conceptualized the study, NA, YK, HY NGI performed experiments and data  
21 analysis, RS, HY, NGI, TM wrote the manuscript.

22 **Competing Interest Statement:** The authors have no competing interests to declare.

23 **Abbreviations**

24 DD, digestive diverticula

25 DGCC, diacylglycerylcarboxy-hydroxymethylcholine

26 DGDG, digalactosyldiacylglycerol

27 EL, epidermal layer

28 IL, inner layer

29 GCC, glycerylcarboxy-hydroxymethylcholine

30 LC-MS/MS, liquid chromatography-tandem mass spectrometry

31 MGDG, monogalactosyldiacylglycerol

32 PC, phosphatidylcholine

33 SQDG, sulfoquinovosyl diacylglycerols

34

35

36

37

38

39 **Abstract**

40 The giant clam *Tridacna crocea* inhabits shallow tropical seas with poorly nourished water  
41 and severe sun irradiation. They harbor symbiotic algae “zooxanthellae” (dinoflagellate family  
42 Symbiodiniaceae) in the mantle tissue and are thought to thrive in this extreme environment  
43 by utilizing photosynthetic products from the algae. However, there is no measure of the  
44 detailed metabolic flow between the host and symbiont to evaluate one of the most  
45 successful symbiotic relationships in nature. Here, we employed liquid  
46 chromatography-tandem mass spectrometry (LC-MS/MS)-based lipidomics and  
47 Fourier-transform ion cyclotron resonance MS imaging on *T. crocea* tissues, revealing a  
48 unique lipid composition and localization with their symbiont algae. We discovered that the  
49 non-phosphorous microalgal betaine lipid diacylglycerylcarboxy-hydroxymethylcholine  
50 (DGCC) was present in all tissues and organs of *T. crocea* to approximately the same degree  
51 as phosphatidylcholine (PC). The fatty acid composition of DGCC was similar to that of PC,  
52 which is thought to have physiological roles similar to that of DGCC. MS imaging showed  
53 co-localization of these lipids throughout the clam tissues.  
54 Glycerylcarboxy-hydroxymethylcholine (GCC), the deacylated derivative of DGCC, was  
55 found to be a free form of DGCC in the clams and was isolated and characterized from  
56 cultured Symbiodiniaceae strains that were isolated from giant clams. These results strongly

57 suggest that giant clams have evolved to smartly utilize DGCCs, phosphorus-free polar lipids  
58 of symbiont algae, as essential membrane components to enable them to thrive in  
59 oligotrophic coral reef milieu.

60

61 **Keywords:** Giant clams, betaine lipid, lipidomics, coral reef, symbiosis

62

63

64

65

66

67

68

69

70

71

72

73 **Introduction**

74 The boring giant clam *Tridacna crocea* is a tridacnid bivalve mollusk and is found in shallow  
75 coral reefs. Giant clams are known to engage in symbiosis with the photosynthetic  
76 dinoflagellate family Symbiodiniaceae, also known as “zooxanthellae” [1, 2]. The  
77 symbiodiniacean cells in giant clams are harbored within a specialized tubular system,  
78 “zooxanthella tubes”, which extend from the stomach of the clam and branch out in their  
79 mantle region [3]. This symbiotic relationship between giant clams and algal cells has  
80 previously been observed from an energy flow viewpoint. For example, algal symbionts within  
81 the *T. crocea* mantle release glucose, and 46–80% of fixed carbon was translocated from the  
82 symbionts to the host tissues [4]. Although these values can vary among studies and clam  
83 species, symbiont algae generally contribute more than half of the carbon requirements of  
84 giant clams [1, 5]. This implies that giant clams are largely dependent on the symbiont algae  
85 for survival, and the symbiotic algae are protected from harmful ultraviolet (UV) radiation by  
86 the host clam [6]. Recently, we reported the isolation of ten different natural sunscreen  
87 compounds, mycosporines, from the mantle tissue of a giant clam [7]. Mass spectrometry  
88 and UV imaging studies have indicated that the distribution of mycosporines within the mantle  
89 tissues differs among compounds. This is thought to be related to their UV absorbing function  
90 and biosynthetic stage, suggesting that mycosporines can first be biosynthesized by clams or

91 symbiotic algae and then translocated to the area where they can function best with  
92 appropriate structural modification [7, 8]. These findings revealed close and complex  
93 relationships between the host animal and photosynthetic microalgae, whereby the functional  
94 metabolites in the symbiotic system are not just 'utilized' as nutrients but are fine-tuned to  
95 optimize their functions to thrive in shallow tropical waters. This 'smart use' of limited  
96 metabolites may have positively contributed to the co-evolution of coral reef invertebrates and  
97 their symbiont algae. Symbiotic relationships between invertebrates and microalgae are  
98 widely observed in the coral reef environments [9, 10]. Each case of symbiosis is thought to  
99 have independently evolved, reflecting their ecological and physiological characteristics.  
100 Therefore, many interesting examples of the 'smart use' of metabolites are expected in each  
101 symbiotic relationship. Although numerous studies on the symbiotic relationship between  
102 invertebrate hosts and dinoflagellates have been conducted, these studies have mainly  
103 focused on the chemical aspects of carbon and nitrogen flow [11, 12]. Limited studies have  
104 investigated the metabolic flow in the symbiotic consortium by identifying individual  
105 compounds present in the host and symbiont [13]. Therefore, further understanding of the  
106 unique metabolic exchange between the host and symbiont is essential to explain the  
107 paradoxical high production in coral reefs. Structural identification of key metabolites by  
108 advanced liquid chromatography-mass spectrometry (LC-MS) in combination with the

109 determination of loci by MS imaging may provide a great deal of information regarding the  
110 flow and functions of metabolites that govern symbiotic relationships between algae and  
111 invertebrates [7]. In the present study, we focused on the lipid component in the giant  
112 clam-Symbiodiniaceae system, as lipids can be useful marker molecules for revealing the  
113 smart utilization of metabolites, from a metabolic flow perspective, between the host and  
114 symbiont. Here, we show the first experimental evidence of the utilization of algal lipids in  
115 giant clams. This finding may facilitate further insight into the co-evolution of coral reef  
116 organisms on a molecular level.

## 117 **Results**

### 118 **Anatomical analysis of *T. crocea* and distribution of Symbiodiniaceae cells**

119 An anatomical overview of *T. crocea* is shown in Fig. 1. The outermost mantle tissue  
120 (epidermal layer; EL) of the clam densely harbors Symbiodiniaceae cells. Conversely, the  
121 pale white mantle tissue (inner layer; IL) contains algal cells at a lower density than that  
122 observed in the EL. The kidney is a large and dark-colored organ. The adductor muscle and  
123 posterior byssal/pedal retractor muscles are located in the middle of the shell. Ctenidia (gill)  
124 can be recognized as a comb-like structure. The digestive diverticula (DD) are surrounded by  
125 off-white gonads. To avoid cross-contamination as much as possible, each of these parts was

126 carefully separated (Fig. S1). However, DD are embedded in the gonads; thus, a small fraction  
127 of the components from interconnected organs was inevitable. To confirm whether algal cells  
128 were present or not, we observed algal chlorophyll fluorescence in both the EL and IL of the  
129 mantle, muscle, gonad, DD, and kidney in the thin section (Fig. 1 C–H). The algal cells shown  
130 as red fluorescent dots under blue excitation light were most densely localized in the EL (Fig.  
131 1C) followed by the IL (Fig. 1D). Although the DD was completely bounded by gonads [14],  
132 the DD and gonads could be easily distinguished by color (Fig. S1). The algal cells (including  
133 digested cells) were also found in the DD region (Fig. 1H). Although the gonad region was  
134 occupied by eggs and sperm (Fig. 1G), small brown patches were observed in rare instances  
135 and often contained a few algal cells (Fig. S2). No algal cells were observed in the muscle  
136 (Fig. 1F). Although a characteristic granular structure, the nephrolith [15], was observed in  
137 the kidneys (Fig. 1E), no algal population was found in this organ. Unfortunately, ctenidia  
138 could not be seen in the observed section.

### 139 **Lipidomic analysis of *T. crocea* organs**

140 We first conducted LC-MS-based lipidomic analyses of extracts from each of the seven  
141 organs including mantle (EL and IL), adductor muscle, kidney, DD, gonads, and ctenidia to  
142 yield a total of 566 lipids (Table S1). These could be divided into six categories:



143 glycerophospholipids (12 classes, 157 species), betaine lipids (3 classes, 79 species),  
144 glycerolipids (9 classes, 209 species), sterol lipids (2 classes, 32 species), sphingolipids (3  
145 classes, 60 species), and free fatty acids (22 species) (Table S1). Semi-quantitative data of  
146 the representative lipid classes are summarized in Fig. 2. In all organs, glycerophospholipids  
147 were predominant among the membrane-associated lipids (Fig. 2C). Betaine lipids were the  
148 second most abundant class and were distributed in all the tissues analyzed, including those  
149 that were free of symbiotic algae. The total amounts of glycerophospholipids, betaine lipids,  
150 sphingolipids, and sterol lipids were 319, 42, 23, and 11 nmol mg<sup>-1</sup> dry tissue, respectively  
151 (Fig. 2D). To confirm the presence of algal cells in each giant clam body part, we further  
152 analyzed algal lipids, namely peridinin and galactosyl lipids, using LC-MS. As expected,  
153 peridinin, a dinoflagellate-borne carotenoid was found at a substantial ion intensity in EL and  
154 DD, followed by IL (Fig. 2E, Table S2). Only trace ions for peridinin were found in other body  
155 parts (Table S2). Moreover, we found three galactosyl lipids: digalactosyldiacylglycerol  
156 (DGDG), sulfoquinovosyl diacylglycerols (SQDG), and monogalactosyldiacylglycerol  
157 (MGDG) (Table S1, S2). Among them, DGDG was the most abundant class followed by  
158 SQDG; MGDG was only detected at low intensities (Fig. 2E, Table S2). Other tissues  
159 exhibited negligible peak intensities (Table S2). Subsequently, we semi-quantitatively  
160 compared the amounts of phospholipids and betaine lipids at the subclass level in each organ

161 (Fig. 2F). The lipidomic profile of each body part differed substantially (Fig. 2F). Glycerol  
162 phosphatidyl ethanolamines (PE) with ether lipids (ether-PE) were predominant among the  
163 glycerophospholipid subclasses in all tissues; ctenidia and gonads were rich in this subclass  
164 (Fig. 2F). The membrane lipid profiles among muscle, IL, and EL were comparable. Gonads  
165 contained considerable amounts of PC and PE in addition to ether-PE. The storage lipid  
166 triacylglycerol (TG) was especially prevalent in the gonads (Fig. S3). The kidney was the  
167 leanest organ with the lowest phospholipid diversity. Among the three known subclasses of  
168 betaine lipids, diacylglycerylcarboxy-hydroxymethylcholine (DGCC) was predominant. Only  
169 trace amounts of diacylglyceryltrimethylhomoserine  
170 (DGTS)/diacylglycerylhydroxymethylalanine (DGTA) were found in all body parts (10–100  
171 pmol mg<sup>-1</sup> dry tissue) except for the kidney where less than 10 pmol mg<sup>-1</sup> was detected. A  
172 trace amount of lyso-DGCCs was detected in the ctenidia, DD, EL, gonad, and IL (Table S1).

173

174 We next compared the fatty acid composition of DGCC and phosphatidylcholine (PC)  
175 because both lipids contain choline as a polar group, and thus they are structurally  
176 compatible (Fig. 2A, B). We detected 18 PC and 96 DGCC species, of which the most  
177 abundant 15 species were compared (Fig. 2G, H, Table S3, S4). Furthermore, 16:0-22:6 was

178 the major fatty acid in both PC and DGCC. Both classes were comprised mostly of  
179 16:0-containing species (e.g., 16:0-22:5, 16:0-18:1, 16:0-20:5, 16:0-16:1, 16:0-20:1, and  
180 16:0-22:4). Some odd numbered species 17:0-22:6 in both DGCC and PC, 15:0-22:6 in PC  
181 were found in *T. crocea* (Fig. 2G, H). Additionally, we analyzed two Symbiodiniaceae culture  
182 strains isolated from giant clams (TsIS-H4 and TsIS-G10, Fig. S4), and found that 16:0-22:6  
183 DGCC was the most abundant species in the tested strains as reported previously [16-18].  
184 However, the overall composition of minor species differed greatly from *T. crocea* (Fig. S4).  
185 Of note, the PC composition of cultured Symbiodiniaceae cells was substantially different  
186 from that of *T. crocea* (Fig. S4).

187

188

189 We also isolated DGCC for further spectral characterization. The <sup>1</sup>H NMR and mass spectral  
190 data for the fraction mainly containing DGCC 22:6\_16:0 agreed well with that reported  
191 previously from *Pavlova lutheri* [19] (Fig. S5, Fig. S6, Table S5). Moreover, HPLC analysis of  
192 DGCC (Fig. S7) supported the data obtained on LC-MS.

193

194 **Identification of glycerylcarboxy-hydroxymethylcholine (GCC) in *T. crocea* and**  
195 **cultured Symbiodiniaceae cells**

196 When the aqueous extract of *T. crocea* was analyzed using LC-MS, we found a novel ion at  $m/z$   
197 252. This ion was absent from the organic extract, suggesting that this compound is a polar  
198 water-soluble substance. The molecular formula,  $C_{10}H_{21}NO_6$ , suggested that the molecule  
199 responsible for this ion was the deacylated derivative of DGCC. To obtain pure GCC, we searched  
200 for the same ion in cultured Symbiodiniaceae strains; the compound was separated using gel  
201 filtration chromatography followed by HPLC. As the proposed structure for GCC has not been  
202 previously reported as a free molecule, the planar structure of GCC was determined based on  
203 spectral data analyses (Supplementary Results, Scheme S1, Fig. S8-10, Table S5). LC-MS/MS  
204 analysis of GCC from Symbiodiniaceae culture strains confirmed the identity between the isolate  
205 and that from the clam (Fig. S11).

206

207 **Lipidomic analysis of *T. crocea* sperm and fertilized eggs**

208 The symbiodiniacean cells are essential for giant clams; however, fertilized eggs and  
209 trochophore stage larvae are free of the symbiont [20], thus the larvae or juveniles must  
210 acquire the symbionts from the ambient environment [21]. A subtle decrease in TG ion

211 intensity was observed only after 72 h, while those of DGCC and PC decreased from 24 h  
212 and markedly at 72 h after fertilization (Fig. 3A–C). These observations are in line with  
213 progress in fertilization as eggs started to divide 3 h after fertilization, while the veliger larvae  
214 and D-shaped larvae with thin shells were observed at 24 h and 72 h after fertilization,  
215 respectively (Fig. S12).

216 Notably, GCC was found at a stable level in all sperm and egg stages (Fig. 3D). Next, we  
217 semi-quantitatively compared the membrane lipid composition of eggs and larvae during  
218 development. As for the adult clam, the amounts of ether-PE, PC, and DGCC were  
219 predominant over other lipids in eggs and larvae up to 24 h. The original compositions of all  
220 classes were maintained at 3 h after fertilization (Fig 3E, F). Lipid compositions started to  
221 change from 24 h and then changed drastically at 72 h (Fig 3F).

## 222 **Lipidomic analysis of other giant clams and bivalves**

223 The above results suggested that DGCC is an indispensable class of fatty acid in *T. crocea*.  
224 We thus investigated whether DGCC was present in other giant clams and non-symbiotic  
225 clams. To confirm this, we compared DGCC in the adductor muscles of *Tridacna squamosa*,  
226 *Tridacna derasa*, and *Hippopus hippopus* along with two other Symbiodiniaceae-free bivalves  
227 as controls: *Atactodea striata* and *Donax faba*, which inhabit the sandy shore in Okinawa.

228 The LC-MS data indicated that the giant clams contained DGCC, whereas those in the  
229 control group did not have detectable amounts of DGCC (Fig. S13).

### 230 **MS imaging analyses**

231 Next, we investigated the localization of lipids in *T. crocea* tissues to assess whether DGCC  
232 and PC, structurally compatible lipids, share distribution patterns. The imaging data were  
233 analyzed for DGCC and PC with two different fatty acid compositions, 16:0-22:6 and  
234 16:0-18:1, which were predominant molecules in *T. crocea* tissues (Fig. 2). As expected,  
235 16:0-22:6 DGCC and PC showed similar distribution patterns, that is, they were dense in the  
236 EL and gonads but only trace levels were visible in the DD, kidney, and muscle (Fig. 4). In the  
237 case of 16:0-18:1 species, DGCC was distributed throughout the mantle tissues (Fig. 4B) and  
238 visceral parts, including DD (Fig. 4A), while PC showed a similar profile to that of the  
239 16:0-22:6 species, except for some signals that were observed in the IL region of the mantle  
240 tissue.

241 We then analyzed the distribution of lyso-PC and lyso-DGCC, which can be enzymatically  
242 transformed from PC and DGCC, respectively. The distribution pattern of lyso-PC (16:0) was  
243 similar to that of PC (16:0-18:1); faint signals were found in the DD, kidney, and muscle.  
244 Notably, in DD, signals for lyso-DGCC (16:0) were clearly observed as opposed to those of

245 lyso-PC (16:0) and 16:0-22:6 DGCC; however, the distribution pattern was somewhat similar  
246 to that of 16:0-18:1 DGCC.

247 Further analysis of the distribution of GCC, a deacylated form of DGCC, revealed that its ion  
248 distribution was different from that of 16:0-22:6 DGCC, showing dense signals in the DD and  
249 kidney, but low intensity in gonads (Fig. 4D). Overall, these observations supported those of  
250 the LC-MS analysis of the dissected organs (Fig. 2, Fig.S7).

251

## 252 **Discussion**

253 In the present study, we performed LC-MS lipidomic and metabolomic analyses of the giant  
254 clam *T. crocea* and cultured giant clam-associated Symbiodiniaceae to identify the unique  
255 metabolic relationships between symbiotic dinoflagellate and their host clams. Strikingly, we  
256 found a betaine lipid, DGCC and its polar head group GCC, not only in the algal cells but also  
257 in the clam tissue extracts at concentrations comparable to those of PC. To date, three  
258 different classes of betaine lipids: DGTS, DGTA, and DGCC have been identified. DGTS and  
259 DGTA are structure isomers found in a wide variety of lower plants, such as algae,  
260 pteridophyta, bryophyta, lichens, and fungi [22, 23]. However, DGCC is only known in limited  
261 taxa of microalgae, including Haptophyceae, Bacillariophyceae, and Dinophyceae [16, 24].

262 Recently, DGCC was detected in the coral *Montipora capitata* [25] and the zoantharian  
263 *Palythoa* sp. [26]; however, the origin of DGCC in these invertebrates is not known since it is  
264 difficult to separate symbiont algae from the host to precisely analyze its origin.

265 We combined metabolomics and MS imaging approaches on large dissectible giant clams to  
266 overcome this problem. This combined approach revealed that DGCC was present in  
267 considerable amounts in all analyzed tissues of *T. crocea*. As expected, DGCC was detected  
268 in the Symbiodiniaceae-rich mantle, because the “zooxanthellae” are known to contain  
269 DGCC [16]; however, the presence of DGCC in the muscle and kidney, which harbor only a  
270 few algae, and in sperm and eggs where no symbiotic algae exist, was unexpected. DGCC is  
271 most likely biosynthesized in microalgae [27], and to the best of our knowledge, this is the first  
272 report that showed the presence of DGCC in animal cells, except for the above-mentioned  
273 Symbiodiniaceae-containing corals [28]. Therefore, the present observations led to a  
274 hypothesis that *T. crocea* take up algal DGCC and metabolites in their own cells and tissues.  
275 Our data along with previous observations showing that algal DGCC is localized in plasma  
276 membranes [29, 30], strongly suggest that DGCC is incorporated in the lipid bilayer of the  
277 clam cells, up to a level equivalent to that of PC [23, 31, 32]. The MS imaging data for two  
278 major fatty acid species illustrated that the most abundant species 16:0-22:6 of PC and  
279 DGCC share similar distribution profiles, suggesting that these lipids are physiologically



280 compatible. However, the second most abundant 16:0-18:1 species of PC and DGCC were  
281 distributed somewhat differently (Fig. 4A). This suggests that lipid molecules at the class and  
282 even species levels have defined loci to present and roles to play [33, 34]. Phytoplankton in  
283 oligotrophic waters with low phosphate concentrations can compensate for this phosphorous  
284 requirement by breaking down PC, and concomitantly, fulfill their cellular phosphorus  
285 requirements by substituting non-phosphorus membrane lipids for phospholipids [31, 32].  
286 Some marine phytoplankton employ betaine lipids for this purpose [31, 32]. Our results  
287 clearly show that *T. crocea* accumulate DGCC in all tissues, which strongly suggests that  
288 giant clams have evolved to utilize DGCC as a phospholipid substitute to thrive in oligotrophic  
289 coral reef waters, similar to phytoplankton. Therefore, the giant clam-Symbiodiniaceae  
290 consortium has positively contributed to their co-evolution by compromising atomic scarcity.  
291 The presence of degraded forms of DGCC, lyso-DGCC and GCC, were found in the clams  
292 and warrant further discussion. Lyso-DGCC was found in the DD and ctenidia, in  
293 substantially higher amounts than in the EL, indicating that lyso-one is probably generated by  
294 the enzymatic digestion of DGCC in DD. Notably, significant quantities of lyso-DGCC were  
295 found in ctenidia and may suggest that they have specific functions in the loci. One of the  
296 notable observations here is the presence and distribution of GCC, which can be both a  
297 precursor and catabolite of DGCC. GCC was distributed in the DD and kidney which is a

298 complementary pattern to DGCC (Fig. 4D). This observation supports that the clam digests  
299 its own symbiont algae in the DD, and algal DGCC can be degraded to form GCC (Fig. 5).  
300 The high GCC signal observed in the DD in the MS imaging data supports this deduction. In  
301 fact, degraded algal cells were observed in the DD (Fig. 1H). Fankboner's detailed  
302 microscopic observation of aged algal cells that were culled and digested by amoebocytes  
303 and conveyed to DD (35, 36), further supports our finding. Therefore, GCC can be  
304 re-acylated to produce DGCC or lyso-DGCC, which is re-distributed and utilized in other  
305 organs and tissues as a component of the lipid membrane (Fig. 5). We found that the  
306 variation in fatty acid species in DGCC from *T. crocea* was highly diverse (49 species), while  
307 the diversity in cultured Symbiodiniaceae strains, which were isolated from giant clams was  
308 lower (18 species); however, their profiles differed greatly apart from 16:0-22:6 being the  
309 major species in both organisms (Fig. 3F, Fig. S4). This differential fatty acid diversity  
310 suggests that the algal DGCC should be re-modeled [37] in the clam to constitute lipids that  
311 meet the physiological needs of the animal. Little is known about DGCC metabolism and  
312 enzymes involved in the re-modeling of DGCC. However, in *Pavlova lutheri*, cytoplasmic  
313 DGCC was shown to act as a carrier of fatty acids to plastid MGDG [29], suggesting the  
314 presence of acyltransferase that utilize DGCC as a substrate. Thus, our result suggests that  
315 giant clams may have acquired such enzymes and metabolic pathways to utilize algal DGCC.

316 It can be speculated that in addition to DD, the kidney is a key organ for the metabolism of  
317 DGCC because a high intensity of GCC was found in the kidney tissue. This indicates that  
318 digested GCC was excreted as urine or stored as waste. However, it is thought that the  
319 kidney in giant clams associates closely with symbiosis with zooxanthella [15]. Although the  
320 function of kidneys in giant clams is not well understood, these organs are disproportionately  
321 large, and high enzymatic activity involving proteases is evident [15, 38]. The body plan  
322 connecting the DD to other parts such as the gonads, gastrointestinal system, and ctenidia,  
323 suggests that the kidneys may play a central role in the use of symbiodiniacean metabolites  
324 in giant clams [15, 39].

325 The distribution of DGCC in completely algae-free eggs and sperm suggests maternal  
326 transfer of these molecules. DGCC was consumed rapidly as development progressed,  
327 similarly to PC, while the storage lipid TG was consumed relatively slowly (Fig 3A–C). It was  
328 also evident that lipid class remodeling occurred at approximately 24 h after fertilization,  
329 suggesting de novo lipid biosynthesis occurs throughout development. The fact that GCC  
330 was found in all egg and sperm stages suggests that not only DGCC but also GCC were  
331 supplied maternally. The level of GCC in sperm, eggs, and larvae was consistent throughout  
332 the stages, suggesting that free GCC can be pooled at certain levels. Although the  
333 biosynthesis of DGCC is not understood to date [27, 40], the presence of DGCC and GCC

334 both in Symbiodiniaceae and the clam may provide some clues in investigating the  
335 metabolism of DGCC. Taken together, we conclude that DGCC takes part in the membrane  
336 lipid metabolism in developing *T. crocea*. It is reported that DGTS take roles of PC in  
337 P-deficient conditions and can function as a hub of glycerolipid remodeling in some  
338 stramenopile microalgae [41, 42]. Our data suggested that DGCC acts to serve fatty acids in  
339 the lipid biosynthesis of *T. crocea*, analogous to other betaine lipids in lower plants.

340 In conclusion, the lipidomic study combined with MS imaging techniques uncovered an  
341 unusual metabolic flow in the giant clam-algae consortium. First, our observation that DGCC  
342 was distributed not only within the symbiont-rich sites in the clam but also in the  
343 symbiont-free tissues, including eggs and sperm, suggests that the clam uses this lipid as a  
344 plasma membrane component. Second, DGCC is most likely enzymatically digested,  
345 remodeled, and then re-distributed to organs within the clam. Although additional clam  
346 species need to be analyzed in future studies, the non-symbiotic clams tested here did not  
347 contain DGCC and GCC, as opposed to all giant clams, which contained DGCC. Therefore,  
348 our results support the hypothesis that the DGCC and GCC found in giant clams are closely  
349 related to the symbiotic relationship between giant clams and algae. Together, these findings  
350 have identified a novel scenario in the metabolic flow between symbiotic algae and clams.

351 First, GCC is biosynthesized within the symbiotic algae and acylated to form DGCC. The

352 algae are trafficked and digested by clams in the DD to generate GCC, which can then be  
353 used as a substrate for acyl transferase for remodeling. This transformation may take place in  
354 either the DD or kidney. The newly formed DGCC can be re-distributed to other organs as a  
355 building block of plasma membranes. Giant clams thus utilize DGCC as a membrane  
356 component, which in turn allows the fast breakdown of PC to supply phosphate for other  
357 indispensable phosphorus-containing biomolecules (Fig. 5). Our results demonstrated that  
358 animal cells can utilize betaine lipids, possibly with unique coupling with phospholipid  
359 metabolism, thereby showing that 'smart utilization' of novel metabolites helps giant clams  
360 thrive in the oligotrophic milieu [32]. These results provide a basis for future investigations  
361 into the paradoxical productivity and biodiversity of coral reef ecosystems.

## 362 **Material and Methods**

### 363 **Clam specimens**

364 Specimens of *T. crocea* were collected in the coastal waters of Ishigaki Island, Okinawa,  
365 Japan under permission from the Okinawa Prefectural Government for research use (No.  
366 30-82, 2-60). *T. crocea* specimens were dissected and each organ including the mantle,  
367 adductor muscle, kidney, digestive diverticula, and ctenidia (gill) was identified based on a  
368 previous report [14]. The mantles were further divided into EL and IL. Other species of giant

369 clams, *T. derasa*, *T. squamosa*, and *H. hippopus* were purchased from local fishers in  
370 Okinawa, and Symbiodiniaceae-free clams, *Atactodea striata* and *Donax faba*, were also  
371 collected in coastal waters of Ishigaki Island.

### 372 **Preparation of sperm, eggs, and larvae**

373 The gonad cutting method was employed to obtain Symbiodiniaceae-free *T. crocea*  
374 reproductive cells [43]. The gonads were collected from three different *T. crocea* individuals.  
375 Giant clams are simultaneous hermaphrodites; thus, the gonads consist of both eggs and  
376 sperm. Eggs and sperm were separated using a 5 µm mesh filter. Fertilization was conducted  
377 using sperm from the other two individuals, under an egg:sperm ratio of 1:50 [44]. After 3 h of  
378 fertilization, eggs were washed with 0.2 µm filtered seawater, and were collected. The  
379 remaining fertilized eggs were kept in a 27 °C incubator and the water was replaced once a  
380 day. The larvae at 24 and 72 h after fertilization were then collected. We repeated this  
381 process with another three individuals. Thus, we used a total of 6 sperm, egg, and larvae  
382 samples. Each sample was lyophilized and extracted as described below for LC-MS analysis.

### 383 **Lipidomics analysis**

384 Total lipid extracts were prepared using the Bligh–Dyer extraction procedure [45]. The lipid  
385 layer was analyzed on a High-performance LC-tandem MS (HPLC-MS/MS) using a

386 quadrupole time-of-flight (TOF) mass spectrometer (TripleTOF 5600+; Sciex,) with a BEH C8  
387 column (2.1 × 150, S 2.5 μm; Waters). Detailed LC-MS conditions and analysis criteria are  
388 described in the SI Materials and Methods. Final data analyses were conducted using  
389 GraphPad Prism. Multiple comparisons with one-way ANOVA followed by a Dunnett's test  
390 were used when applicable.

### 391 **Isolation of GCC from cultured Symbiodiniaceae cells**

392 Two Symbiodiniaceae culture strains, TsIS-H4, and TsIS-G10, isolated from giant clam *T.*  
393 *squamosa* in our laboratory, were used for GCC isolation. The culture strains were  
394 maintained in a 27 °C incubator under a light regime of 80–120 μmol photon m<sup>-2</sup> s<sup>-1</sup> (12:12 h  
395 [light: dark] period) in IMK medium (Sanko Jyunyaku, Tokyo, Japan). Each of the cell pellets  
396 from these culture strains was extracted with water on ice using an ultrasonic homogenizer.  
397 The water extract was separated to give pure GCC, and its structure was determined by  
398 spectral analyses as described in the SI Materials and Methods.

### 399 **Isolation of DGCC from *T. crocea***

400 Adductor muscles from eight cultured specimens of *T. crocea* purchased from local fishers  
401 were used to obtain DGCC. Details of isolation and structural assignment are described in the  
402 SI Materials and Methods.

403 **MS-imaging**

404 Consecutive 10- $\mu$ m frozen sections were mounted onto glass slides with/without hematoxylin  
405 and eosin (HE) staining and onto indium tin oxide-coated glass slides (Bruker Daltonics,  
406 Billerica, MA, USA) for MS imaging. The section unstained with HE was observed under an  
407 epifluorescent microscope (BX50, Olympus, Tokyo, Japan). After MS imaging, the sections  
408 were subjected to HE staining for morphological observation. Imaging samples were prepared  
409 as previously described [46, 47]. MS analysis was performed using SolariX Fourier-transform  
410 ion cyclotron resonance (FT-ICR) (Bruker Daltonics) mass spectrometers. Detailed analytical  
411 settings are provided in the SI Materials and Methods.

412 **Statistical Analysis**

413 Data were obtained from randomly collected specimens. Number of specimens is indicated in  
414 figure legends. Datapoints representing mean value and error bars  $\pm$ SD were analyzed using  
415 one-way analysis of variance (ANOVA) and Dunnett's multiple comparison test using  
416 GraphPad Prism 8.0.3.

417 **Acknowledgments and funding sources**

418 The authors thank the staff at the Yeyama field station, Fisheries Technology Institute, Japan  
419 Fisheries Research and Education Agency for their support during clam sampling. Hiroki



420 Ikeda at Hokkaido University assisted initial data collection. We would like to thank Editage  
421 ([www.editage.com](http://www.editage.com)) for English language editing. This study was supported by Japan Society  
422 for the Promotion of Science KAKENHI grant no. 21H04742 to HY.  
423 Some research equipment for the MEXT Project for promoting public utilization of advanced  
424 research infrastructure (Program for advanced research equipment platforms, grant number  
425 JPMXS0450200120) was used in this study.

426  
427  
428  
429  
430  
431  
432

### 433 **References**

- 434 1. Trench RK, Wethey DS, Porter JW. Observations on the symbiosis with  
435 zooxanthellae among the Tridacnidae (Mollusca, Bivalvia). *Biol Bull.*  
436 1981;161(1):180–198. <https://doi.org/10.2307/1541117>
- 437 2. Ikeda S, Yamashita H, Kondo SN, Inoue K, Morishima SY, Koike K. Zooxanthellal  
438 genetic varieties in giant clams are partially determined by species-intrinsic and  
439 growth-related characteristics. *PLOS ONE.* 2017;12(2):e0172285.  
440 <https://doi.org/10.1371/journal.pone.0172285>

- 441 3. Norton JH, Shepherd MA, Long HM, Fitt WK. The zooxanthellal tubular system in the  
442 giant clam. *Biol Bull.* 1992;183(3):503–506. <https://doi.org/10.2307/1542028>
- 443 4. Ishikura M, Adachi K, Maruyama T. Zooxanthellae release glucose in the tissue of a  
444 giant clam, *Tridacna crocea*. *Mar Biol.* 1999;133(4):665–673.  
445 <https://doi.org/10.1007/s002270050507>
- 446 5. Klumpp D, Lucas J. Nutritional ecology of the giant clams *Tridacna tevoroa* and *T.*  
447 *derasa* from Tonga: influence of light on filter-feeding and photosynthesis. *Mar Ecol*  
448 *Prog Ser.* 1994;107:147–156. <https://doi.org/10.3354/meps107147>
- 449 6. Ishikura M, Kato C, Maruyama T. UV-absorbing substances in zooxanthellate and  
450 azooxanthellate clams. *Mar Biol.* 1997;128(4):649–655.  
451 <https://doi.org/10.1007/s002270050131>
- 452 7. Goto-Inoue N, Sato T, Morisasa M, Yamashita H, Maruyama T, Ikeda H, et al. Mass  
453 spectrometry imaging reveals differential localization of natural sunscreens in the  
454 mantle of the giant clam *Tridacna crocea*. *Sci Rep.* 2020;10(1):656.  
455 <https://doi.org/10.1038/s41598-019-57296-9>
- 456 8. Shick JM. The continuity and intensity of ultraviolet irradiation affect the kinetics of  
457 biosynthesis, accumulation, and conversion of mycosporine - like amino acids

- 458 (MAAs) in the coral *Stylophora pistillata*. *Limnol Oceanogr.*2004;49(2):442–458.
- 459 <https://doi.org/10.4319/lo.2004.49.2.0442>
- 460 9. Baker AC. Flexibility and specificity in coral-algal symbiosis: diversity, ecology, and  
461 biogeography of Symbiodinium. *Annu Rev Ecol Evol Syst.*2003;34(1):661–689.
- 462 <https://doi.org/10.1146/annurev.ecolsys.34.011802.132417>
- 463 10. Trench RK. Microalgal-invertebrate symbiosis—a review. *Endocytobiosis Cell Res.*  
464 1993;9:135–175
- 465 11. Wild C, Huettel M, Kluefer A, Kremb SG, Rasheed MY, Jørgensen BB. Coral mucus  
466 functions as an energy carrier and particle trap in the reef ecosystem. *Nature.*  
467 2004;428(6978):66–70. <https://doi.org/10.1038/nature02344>
- 468 12. De Goeij JM, Van Oevelen D, Vermeij MJ, Osinga R, Middelburg JJ, De Goeij AF, et  
469 al. Surviving in a marine desert: the sponge loop retains resources within coral reefs.  
470 *Science.* 2013; 342(6154):108–110. <https://doi.org/10.1126/science.1241981>
- 471 13. Gordon BR, Leggat W. Symbiodinium—invertebrate symbioses and the role of  
472 metabolomics. *Mar Drugs.* 2010;8(10):2546–2568.
- 473 <https://doi.org/10.3390/md8102546>
- 474 14. Norton JH, Jones GW. *The giant clam: an anatomical and histological atlas.* 1992.

- 475 15. Reid RGB, Fanklboner PV, Brand DG. Studies of the physiology of the giant clam  
476 *Tridacna gigas* linné—II. Kidney function. *Comp Biochem Physiol A*.  
477 1984;78(1):103–108. [https://doi.org/10.1016/0300-9629\(84\)90100-2](https://doi.org/10.1016/0300-9629(84)90100-2)
- 478 16. Kato M, Sakai M, Adachi K, Ikemoto H, Sano H. Distribution of betaine lipids in marine  
479 algae. *Phytochemistry*. 1996;42(5):1341–1345.  
480 [https://doi.org/10.1016/0031-9422\(96\)00115-X](https://doi.org/10.1016/0031-9422(96)00115-X)
- 481 17. Leblond JD, Khadka M, Duong L, Dahmen JL. Squishy lipids: temperature effects on  
482 the betaine and galactolipid profiles of a C 18/C 18 peridinin - containing  
483 dinoflagellate, *Symbiodinium microadriaticum* (D inophyceae), isolated from the  
484 mangrove jellyfish. *Phycol Res*. 2015;63(3):219–230.  
485 <https://doi.org/10.1111/pre.12093>
- 486 18. Rosset S, Koster G, Brandsma J, Hunt AN, Postle AD, D'angelo C. Lipidome analysis  
487 of *Symbiodiniaceae* reveals possible mechanisms of heat stress tolerance in reef  
488 coral symbionts. *Coral Reefs*. 2019;38(6):1241–1253.  
489 <https://doi.org/10.1007/s00338-019-01865-x>

- 490 19. Kato M, Adachi K, Hajiro-Nakanishi K, Ishigaki E, Sano H, Miyachi S. A betaine lipid  
491 from *Pavlova lutheri*. *Phytochemistry*. 1994;37(1):279-280.  
492 [https://doi.org/10.1016/0031-9422\(94\)85041-0](https://doi.org/10.1016/0031-9422(94)85041-0)
- 493 20. Fitt WK, Trench RK. Spawning, development, and acquisition of zooxanthellae by  
494 *Tridacna squamosa* (Mollusca, Bivalvia). *Biol Bull*. 1981;161(2):213–235.  
495 <https://doi.org/10.2307/1540800>
- 496 21. Fitt WK. The role of chemosensory behavior of *Symbiodinium microadriaticum*,  
497 intermediate hosts, and host behavior in the infection of coelenterates and molluscs  
498 with zooxanthellae. *Mar Biol*. 1984;81(1):9–17. <https://doi.org/10.1007/BF00397620>
- 499 22. Künzler K, Eichenberger W. Betaine lipids and zwitterionic phospholipids in plants  
500 and fungi. *Phytochemistry*. 1997;46(5):883–892.  
501 [https://doi.org/10.1016/s0031-9422\(97\)81274-5](https://doi.org/10.1016/s0031-9422(97)81274-5)
- 502 23. Cañavate JP, Armada I, Ríos JL, Hachero-Cruzado I. Exploring occurrence and  
503 molecular diversity of betaine lipids across taxonomy of marine microalgae.  
504 *Phytochemistry*. 2016 ;124:68–78. <https://doi.org/10.1016/j.phytochem.2016.02.007>
- 505 24. Aveiro SS, Melo T, Figueiredo A, Domingues P, Pereira H, Maia IB, Silva J, et al. The  
506 polar lipidome of cultured *Emiliana huxleyi*: a source of bioactive lipids with relevance

- 507 for biotechnological applications. *Biomolecules*. 2020;10(10):1434.
- 508 <https://doi.org/10.3390/biom10101434>
- 509 25. Roach TNF, Dilworth J, Jones AD, Quinn RA, Drury C. Metabolomic signatures of  
510 coral bleaching history. *Nat Ecol Evol*. 2021;5(4):495–503.
- 511 <https://doi.org/10.1038/s41559-020-01388-7>
- 512 26. Sikorskaya TV, Efimova KV, Imbs AB. Lipidomes of phylogenetically different  
513 symbiotic dinoflagellates of corals. *Phytochemistry*. 2021;181:112579.
- 514 <https://doi.org/10.1016/j.phytochem.2020.112579>
- 515 27. Kato M, Kobayashi Y, Torii A, Yamada, M. Betaine Lipids in Marine Algae. In:  
516 *Advanced Research on Plant Lipids*. Springer. 2003;pp19-22. Dordrecht.
- 517 [https://doi.org/10.1007/978-94-017-0159-4\\_3](https://doi.org/10.1007/978-94-017-0159-4_3)
- 518 28. Imbs AB, Ermolenko EV, Grigoruchuk VP, Sikorskaya TV, Velansky PV. Current  
519 progress in lipidomics of marine invertebrates. *Mar Drugs*. 2021;19(12):660.
- 520 <https://doi.org/10.3390/md19120660>
- 521 29. Eichenberger W, Gribi C. Lipids of *Pavlova lutheri*: cellular site and metabolic role of  
522 DGCC. *Phytochemistry*. 1997;45(8):1561–1567.
- 523 [https://doi.org/10.1016/S0031-9422\(97\)00201-X](https://doi.org/10.1016/S0031-9422(97)00201-X)

- 524 30. Künzler K, Eichenberger W, Radunz A. Intracellular localization of two betaine lipids  
525 by cell fractionation and immunomicroscopy. *Z Naturforsch C J Biosci.*  
526 1997;52(7–8):487–495. <https://doi.org/10.1515/znc-1997-7-811>
- 527 31. Martin P, Van Mooy BA, Heithoff A, Dyhrman ST. Phosphorus supply drives rapid  
528 turnover of membrane phospholipids in the diatom *Thalassiosira pseudonana*. *ISME*  
529 *J.* 2011;5(6):1057–1060. <https://doi.org/10.1038/ismej.2010.192>
- 530 32. Van Mooy BA, Fredricks HF, Pedler BE, Dyhrman ST, Karl DM, Koblížek M, et al.  
531 Phytoplankton in the ocean use non-phosphorus lipids in response to phosphorus  
532 scarcity. *Nature.* 2009;458(7234):69–72. <https://doi.org/10.1038/nature07659>
- 533 33. Murphy RC, Hankin JA, Barkley RM. Imaging of lipid species by MALDI mass  
534 spectrometry. *J Lipid Res.* 2009;50 Supplement:S317–S322.  
535 <https://doi.org/10.1194/jlr.R800051-JLR200>
- 536 34. Bourceau P, Michellod D, Geier B, Liebeke M. Spatial metabolomics shows  
537 contrasting phosphonolipid distributions in tissues of marine bivalves. *PeerJ Anal*  
538 *Chem.* 2022;4:e21. <https://doi.org/10.7717/peerj-achem.21>
- 539 35. Fankboner PV. Intracellular digestion of symbiotic zooxanthellae by host  
540 amoebocytes in giant clams (*Bivalvia*: Tridacnidae), with a note on the nutritional role

- 541 of the hypertrophied siphonal epidermis. Biol Bull. 1971;141(2):222–234.
- 542 <https://doi.org/10.2307/1540113>
- 543 36. Morton B. The diurnal rhythm and the processes of feeding and digestion in *Tridacna*
- 544 *crocea* (Bivalvia: Tridacnidae). J Zool. 1978;185(3):371–387.
- 545 <https://doi.org/10.1111/j.1469-7998.1978.tb03339.x>
- 546 37. Huang B, Marchand J, Thiriet-Rupert S, Carrier G, Saint-Jean B, Lukomska E,
- 547 Moreau B, et al. Betaine lipid and neutral lipid production under nitrogen or
- 548 phosphorus limitation in the marine microalga *Tisochrysis lutea* (Haptophyta). Algal
- 549 Res. 2019;40:101506. <https://doi.org/10.1016/j.algal.2019.101506>
- 550 38. Rees TAV, Fitt WK, Yellowlees D. Host glutamine synthetase activities in the giant
- 551 clam-zooxanthellae symbiosis: effects of clam size, elevated ammonia and
- 552 continuous darkness. Mar Biol. 1994;118(4):681–685.
- 553 <https://doi.org/10.1007/BF00347516>
- 554 39. Fankboner PV, Reid, RGB. Nutrition in giant clams (Tridacnidae). The
- 555 Bivalvia-Proceedings of a Memorial Symposium in Honour of Sir Charles Maurice
- 556 Yonge, Edinburgh. 1986, B. Morton, ed. Hong Kong University Press, Hong Kong.
- 557 1991. pp. 195-209



- 558 40. Hunter JE, Brandsma J, Dymond MK, Koster G, Moore CM, Postle AD, et al.  
559 Lipidomics of *Thalassiosira pseudonana* under phosphorus stress reveal underlying  
560 phospholipid substitution dynamics and novel diglycosylceramide substitutes. *Applied*  
561 *and environmental microbiology*. 2018;84(6):e02034-02017.  
562 <https://doi.org/10.1128/AEM.02034-17>.
- 563 41. Murakami H, Nobusawa T, Hori K, Shimojima M, Ohta, H. Betaine lipid is crucial for  
564 adapting to low temperature and phosphate deficiency in *Nannochloropsis*. *Plant*  
565 *Physiol*. 2018;177(1):181-193. 41. <https://doi.org/10.1104/pp.17.01573>
- 566 42. Cañavate JP, Armada I, Hachero - Cruzado, I. Interspecific variability in phosphorus  
567 - induced lipid remodelling among marine eukaryotic phytoplankton. *New Phytol*.  
568 2017;213(2):700-713. <https://doi.org/10.1111/nph.14179>
- 569 43. Murakoshi M, Hirata H. Self-fertilization in four species of giant clam. *Nippon Suisan*  
570 *Gakkaishi*. 1993;59(4):581–587. <https://doi.org/10.2331/suisan.59.581>
- 571 44. Neo M, Todd P, Chou L, Teo S. Spawning induction and larval development in the  
572 fluted giant clam, *Tridacna squamosa* (Bivalvia: Tridacnidae). *Nat Singapore*.  
573 2011;4:157–161

- 574 45. Bligh EG, Dyer WJ. A rapid method of total lipid extraction and purification. Can J  
575 Biochem Physiol. 1959;37(8):911–917. <https://doi.org/10.1139/o59-099>
- 576 46. Goto-Inoue N, Manabe Y, Miyatake S, Ogino S, Morishita A, Hayasaka T, et al.  
577 Visualization of dynamic change in contraction-induced lipid composition in mouse  
578 skeletal muscle by matrix-assisted laser desorption/ionization imaging mass  
579 spectrometry. Anal Bioanal Chem. 2012;403(7):1863–1871.  
580 <https://doi.org/10.1007/s00216-012-5809-x>
- 581 47. Goto-Inoue N, Kashiwagi A, Kashiwagi K, Mori T. Metabolomic approach for  
582 identifying and visualizing molecular tissue markers in tadpoles of *Xenopus tropicalis*  
583 by mass spectrometry imaging. Biol Open. 2016;5(9):1252–1259.  
584 <https://doi.org/10.1242/bio.019646>
- 585
- 586
- 587
- 588
- 589

590

## 591 **Supporting Information**

### 592 **Supplementary Methods**

#### 593 **LC-MS/MS-based lipidomics**

594 Approximately 5 mg of lyophilized samples were homogenized with a mortar and pestle and  
595 weighed in 1.5 mL tubes. Then, 200  $\mu$ L/mg ice-cold extraction solvent (water: methanol:  
596 chloroform 0.8:2:1, v/v/v) containing 1 mg/mL deuterium labeled phosphatidylcholine  
597 15:0–18:1(d7) (PC), lysophosphatidylcholine 18:1(d7) (LPC), phosphatidylethanolamine  
598 15:0–18:1(d7) (PE), lysophosphatidylethanolamine 18:1(d7) (LPE), phosphatidylglycerol  
599 15:0–18:1(d7) (PG), phosphatidylinositol 15:0–18:1(d7) (PI), phosphatidylserine  
600 15:0–18:1(d7) (PS), triacylglycerol 15:0–18:1(d7)-15:0 (TG), diacylglycerol 15:0–18:1(d7)  
601 (DG), monoacylglycerol 18:1(d7) (MG), cholesteryl ester 18:1(d7) (CE), sphingomyelin  
602 18:1(d9) (SM), and diacyl-N,N,N-trimethylhomoserine 16:0–16:0(d9) (DGTS) were added to  
603 the homogenates and sonicated on ice for 2 min by an ultrasonic homogenizer. The  
604 extraction mixture was allowed to stand for 10 min, vortexed, and then centrifuged at  
605 16,000 $\times$ g at 4 °C for 3 min. Next, 200  $\mu$ L chloroform and distilled water were added to the  
606 supernatant (760  $\mu$ L) and vortexed for 30 s. After centrifugation at 16,000 $\times$ g at 4 °C for 3 min,

607 the upper aqueous layer was removed, and the lower layer was transferred to new 1.5 mL  
608 glass vials and evaporated to dryness in a SPEED VAC (Thermo Scientific). The dried  
609 extracts were resuspended in MeOH and diluted 10-fold with MeOH for LC-MS analysis.  
610 High-performance LC-tandem MS (HPLC-MS/MS) was performed on a quadrupole  
611 time-of-flight (TOF) mass spectrometer (TripleTOF 5600+; Sciex, Framingham, MA, USA)  
612 with a BEH C8 column (2.1x150, S 2.5  $\mu$ m; Waters, Milford, MA, USA) and solvents A (0.1%  
613 formate + 10 mM ammonium formate in water) and B (0.1% formate + 10 mM ammonium  
614 formate in MeOH: 2-propanol (85:15, v/v)). The flow rate was 0.3 mL/min with the following  
615 time program: B conc 75%, 0–2 min; 75%–99%, 2–18 min; 99%, 18–24 min; 99%–75%,  
616 24–25 min; 30 min stop. The column oven temperature was 50 °C, and 3 (positive) and 5  $\mu$ L  
617 (negative) of the samples were injected. The following MS parameters were set based on the  
618 lipidomic analysis reported previously(1): MS range 100–1,250 Da, ion spray voltage floating  
619 +5,5 kV (positive) and -4,5 kV (negative), gas temperature 350 °C, declustering potential  
620 80V, and accumulation time 250 ms. MS2 was measured using the high sensitivity mode for  
621 information dependent analysis (IDA), which acquires 15 times MS2 per cycle. MS2  
622 parameters were MS range 100–1,250 Da, gas temperature 350 °C, collision energy 40–70 V  
623 (positive) and -30–60 V (negative). The collision energy in the positive ion mode was

624 stronger than that used by Tsugawa [1] for clearer acquisition of the fatty acid fragment of  
625 diacylglycerylcarboxy-hydroxymethylcholine (DGCC).

626 We used a mixture of all samples for quality control (QC). QC data were acquired for every  
627 five samples during the analysis to monitor the intensity drift of peaks detected by LC-MS and  
628 reduce the number of failed MS2 acquisitions of peaks in the IDA mode.

### 629 **Lipidomic data analysis**

630 LC-MS/MS data were analyzed using MS-DIAL version 4.24, and lipid annotation was  
631 automatically conducted by matching with an *in silico* MS/MS library available on the RIKEN  
632 PRIME website (<http://prime.psc.riken.jp/>); the results were manually curated with the  
633 confirmation of the diagnostic product ion and neutral losses in addition to the fatty acid  
634 fragmentation of each lipid species. We used the table reported by Tsugawa to characterize  
635 each lipid species [2].

636 The parameters below were used for the MS-DIAL analysis: retention time begin, 0.5 min;  
637 retention time end, 28 min; mass range begin, 100 Da; mass range end, 2000 Da; accurate  
638 mass tolerance (MS1), 0.01 Da; MS2 tolerance, 0.025 Da; maximum charge number, 2;  
639 smoothing level, 3; minimum peak width, 5 scans; minimum peak height 1000; mass slice  
640 width, 0.1 Da; sigma window value, 0.5; exclude after precursor ion, true; keep the isotopic

641 ions until 0.5 Da; retention time tolerance for identification, 100 min; MS1 for identification,  
642 0.01 Da; accurate mass tolerance (MS2) for identification, 0.05 Da; identification score cut-off,  
643 70%; using retention time for scoring, true; relative abundance cut-off, 0; top candidate report,  
644 true; retention time tolerance for alignment, 0.5 min; MS1 tolerance for alignment, 0.015 Da;  
645 peak count filter, 0; remove feature based on blank information, true; sample max/blank  
646 average, 5; keep identified metabolites, true; keep removable features and assign the tag,  
647 true; and gap filling by compulsion, true.

648

#### 649 **Preparation of sperm and fertilized eggs form *T. crocea*.**

650 We conducted artificial fertilization using gonad cut method [3] as follows. The gonads were  
651 collected from three different individuals of *T. crocea*. Eggs and sperm from gonads were  
652 separated by using 5 µm mesh filter. Fertilization was conducted using sperm from other two  
653 individuals, under eggs: sperm ratio 1:50. After 3 hours fertilization, eggs were washed with  
654 0.2 µm filtered seawater, and we collected the eggs. Remaining fertilized eggs were and kept  
655 at 27°C in an incubator changing water once a day. The larvae at 24 and 72 hours after  
656 fertilization were also collected. We repeated this process with another three individuals.

657 Thus, we used total 6 sperm, egg, and larvae samples. Each sample was lyophilized and  
658 extracted as described above to prepare analyte for LC-MS analysis.

#### 659 **Isolation of GCC from cultured Symbiodiniaceae cells.**

660 To analyze betaine lipid of Symbiodiniaceae cells, we used three Symbiodiniaceae culture  
661 strains (TsIS-H4, and TsIS-G10) isolated from giant clams. The cell pellets from culture  
662 strains were extracted with water on ice using an ultrasonic homogenizer (Smurt NR 50M;  
663 Microtec, Funabashi, Chiba, Japan). The water extract was separated by dialysis and the  
664 small molecular fraction was subjected to Sephadex LH-20 gel filtration chromatography (GE  
665 Healthcare, Chicago, IL, USA). The glycerylcarboxy-hydroxymethylcholine (GCC)-containing  
666 fraction was further separated using a Hillic HPLC column (Develosil ANIDIUS, NOMURA  
667 CHEMICAL CO., LTD, Japan) with an acetonitrile–water gradient, and pure GCC (IH2-78-7,  
668 1.00 mg) was obtained. Subsequently, HRESIMS ( $m/z$  252.1442  $C_{10}H_{21}NO_6$ , D 2 ppm) was  
669 performed.

#### 670 **Isolation of DGCC of *T. crocea***

671 Cultured *T. crocea* (8 specimens) were dissected to yield EL (28g), IL (23g), ctenidia (5g),  
672 kidney (4g), DD (2g), foot (10g), muscle (6g). The muscle was used to isolate DGCC.  
673 Samples were first extracted with 27 mL of extraction solvent system

674 (water:methanol:chloroform = 2 : 5 : 2) and water (12mL) was added after homogenization.  
675 The solvent was partitioned by centrifugation and both upper layer and lower layer were  
676 concentrated to dryness. The organic extract (lower layer, 11 mg) was separated by counter  
677 current partition chromatography (CPC MODEL LLB; SIC Japan, Tokyo, Japan) using a  
678 solvent system; chloroform: n-heptane: n-butanol: methanol: acetic acid (60%) at 3:5:3:3:5  
679 ratio. The lower phase was used as the mobile phase at a rotor speed of 1000 rpm. The  
680 sample was suspended in the upper and lower layers of the solvent system (3 mL) and  
681 injected in the descending mode at a flow of 9.0 mL/min. Elution was initially performed in the  
682 descending mode at 2 mL/min with a column pressure of 35 kg/cm<sup>2</sup> and then switched to the  
683 ascending mode (9 mL/min, 22 kg/cm<sup>2</sup>). The column was then flushed with methanol, after  
684 which the eluents (31 tubes, 10 mL/tube) was collected and combined into 10 fractions  
685 (IH9-28-1~10). Each fraction was analyzed by thin layer chromatography and LC-MS/MS to  
686 characterize its lipid composition. Fraction 3 (IH9-28-3, 4 mg) containing DGCC 22:6\_16:0  
687 (HRESIMS  $m/z$  800.5954,  $M + H^+$ ,  $C_{10}H_{21}NO_6$ ) as a major lipid was used for spectral analysis.

#### 688 **Analysis of DGCC on HPLC-CAD**

689 As DGCC does not offer strong and characteristic UV absorption, charge aerosol detector  
690 (CAD, CORONA Ultra RS; Thermo Fisher Scientific, Waltham, MA, USA) was used to quantify



691 DGCC to further support our LC/MS analysis data. We used the lipophilic portion of the  
692 dissected samples described above. Each of the extract was dissolved in MeOH (1mg/mL),  
693 and POPG was added as an internal standard at final concentration of 1mg/mL. InertSustain  
694 C8-5 (4.6 x 250 mm, GL Sciences) was used with a gradient of acetonitrile (0.05% TFA) and  
695 water (0.05% TFA) at oven temperature at 50°C. Amount of DGCC was calculated relative to  
696 that of POPG (Fig S5).

697

## 698 **MS imaging**

699 Consecutive 10- $\mu$ m sections were cut directly from the frozen samples using a cryostat (CM  
700 1950; Leica Microsystems, Wetzlar, Germany). Serial sections were mounted onto glass  
701 slides for with/without hematoxylin and eosin (HE) staining and onto indium tin oxide-coated  
702 glass slides (Bruker Daltonics, Billerica, MA, USA) for MS imaging. The section without HE  
703 stain was observed under epifluorescent microscope (BX50, Olympus, Tokyo, Japan) to  
704 confirm the distribution/localization of Symbiodiniaceae cells in the section. After MS imaging,  
705 the sections were subjected to HE staining for morphological observation. Samples were  
706 prepared as previously described [4, 5]. Briefly, a matrix solution containing 50 mg/mL  
707 2,5-dihydroxybenzoic acid in methanol: water (8:2, v/v) was used, with 1–2 mL prepared

708 before use and sprayed uniformly over the frozen sections using an airbrush with a 0.2-mm  
709 nozzle (Procon Boy FWA Platinum; Mr. Hobby, Tokyo, Japan). MS analysis was performed  
710 using TOF/TOF 5800 (AB Sciex, Framingham, MA, USA) and SolariX Fourier-transform ion  
711 cyclotron resonance (FT-ICR) (Bruker Daltonics) mass spectrometers. To optimize FT-ICR  
712 MS, we set the mass range from  $m/z$  400–1200 for DGCC/PC, and  $m/z$  100-500 for GCC and  
713 the spatial resolution to 150  $\mu\text{m}$  for mantle tissue and 220  $\mu\text{m}$  for the frozen viscera of the  
714 animal.

715

## 716 **Supplementary Results**

717 Structure determination of GCC and identification of DGCC.

718 The molecular formula for GCC,  $\text{C}_{10}\text{H}_{21}\text{NO}_6$  was established by the HRESIMS molecular ion  
719 at  $m/z$  252.1442 ( $\text{M} + \text{H}$ )<sup>+</sup>,  $\delta$  2 ppm.  $^1\text{H}$  NMR (Fig. S6, Table S5) data indicated a presence of  
720 trimethyl amino group, and a characteristic singlet appeared at  $\delta$  4.85. In the  $^{13}\text{C}$  NMR data  
721 only 6 resonances (Fig. S7), accounting for 8 carbons appeared. Resonances for C-1" and  
722 carboxylate, were missing. Two-dimensional NMR data, however assigned most  $^1\text{H}$  and  $^{13}\text{C}$   
723 resonances as shown in Table S5. HSQC spectrum was particularly useful to detect acetal  
724 carbon 1" which was missing in  $^{13}\text{C}$  NMR data. Thus, these data constructed the planer

725 structure of GCC mostly, except for a carboxylate group. ESIMS/MS data showing diagnostic  
726 ions for DGCC at  $m/z$  104 and 132 (Scheme S1, Fig. S8, 9), however, supported the  
727 proposed structure with the carboxylate group at C-1". Thus, the planer structure of GCC was  
728 assigned.

729 The molecular formula for DGCC 22:6\_16:0,  $C_{10}H_{21}NO_6$  was supported by HRESIMS  $m/z$   
730 800.5954,  $M + H^+$ , D7 ppm (Fig. S10).  $^1H$  NMR data showed characteristic acetal proton at  
731 d4.78 (Fig. S11), however, area of this peak and trimethylammonium group was about 1:24,  
732 suggesting about the half of this fraction contains PC. ESIMS showing diagnostic fragment  
733 ions at  $m/z$  104 and 132, assuring the identity of this lipid.

734

### 735 **Supplementary Scheme**

736 **Scheme S1. Planer structure of GCC.** (A) fragmentations in ESIMS/MS. (B) Correlation  
737 NMR data for GCC.

738

739

740

741 **Supplementary Figures**

742 **Fig. S1.** Dissected clam (*Tridacna crocea*) specimen, indicating all body parts used for  
743 LC-MS analyses. Adductor muscle is covered by a thin reddish-brown membrane containing  
744 Symbiodiniaceae cells. To avoid contamination of algal cells, we removed this membrane  
745 from adductor muscle specimens.

746 **Fig. S2. Light micrographs for gonad region.** Small brown patches (arrows) were  
747 observed in the gonad region. B, C high magnification observations. Under blue right  
748 excitation, a few algal cells were recognized within the patches (C).

749 **Fig. S3. Amounts ether-PE (left) and storage lipids TG (right).**

750 **Fig. S4. Heatmap for DGCC (left) and PC (right) in Symbiodiniaceae culture strains**  
751 **(TsIS-H4, and TsIS-G10).** Positive ion mode was used for DGCC analysis while negative  
752 mode was employed for PC data acquisition because substantially fewer peaks were  
753 obtained in the opposite polarity in both classes.

754 **Fig. S5. <sup>1</sup>H NMR (400 MHz) for the DGCC-containing fraction taken in CD<sub>3</sub>OD**

755 **Fig. S6. ESIMS for DGCC 22:6\_16:0**

756 **Fig. S7. CAD analysis of DGCC in each body part of *T. crocea* (A) HPLC-CAD trace of**  
757 **each extract. A large peak at  $T_R$  around 22 min is POPG (1 mg/mL), and DGCC**  
758 **eluted right after the standard (black arrow). The area of concentration of DGCC**  
759 **was calculated from the area of standard and DGCC. One sample was employed**  
760 **to obtain this data due to sample availability.**

761 Fig. S8.  $^1\text{H}$  NMR (400 MHz) of GCC

762 Fig. S9.  $^{13}\text{C}$  NMR (100 MHz) of GCC in  $\text{D}_2\text{O}$

763 Fig. S10. ESIMS/MS data for GCC

764 Fig.S11 LC-MS analyses of GCC from *Symbiodinium* (A) and *T. crocea* (B)

765 Fig. S12. Eggs, sperms, and larvae of *Tridacna crocea* in each developmental stage

766 Fig. S13. Ion intensities for DGCC in giant clams and other bivalves. *T. squamosa* (n =  
767 3), *T. derasa* (n = 3), *Hippopus hippopus* (n = 1), and bivalves *Donax faba* (n = 3), and  
768 *Atactodea striata* (n = 3).

769 Figure S14. Ion intensity for GCC in each organ.

770 N = 5, One-way ANOVA followed by a Dunnett's test for multiple group comparison. *P* values  
771 are indicated.

772

773

774

775

776

777

778

779

780

781

782

783

784

785

786

787

788

789

790

791

792 **Supplementary Tables**

793 **Table S1. A summary of semi-quantitative lipidomics data for each body parts of *T.***  
794 ***crocea*<sup>a</sup>**

795 <sup>a</sup> Lipid classes were grouped in color. For lipid class nomenclature see,  
796 <http://prime.psc.riken.jp/compms/msdial/lipidnomenclature.html>

797 <sup>b</sup> DGTS and DGTA are indistinguishable with the analytical method employed here as they are  
798 structural isomers to each other [7].

799 <sup>c</sup> Galactosyl lipids and free fatty acids (FA) were not quantified, and thus marked ‘-’

800 **Table S2. LC-MS ion intensities for plant derived metabolites**

801 **Table S3. Semi-quantitative lipidomics data:** Grand average of each lipid species was  
802 ordered to show 15 most abundant DGCC species in each organ of *T. crocea*.

803 **Table S4. Semi-quantitative lipidomics data.** Grand average of each lipid species was  
804 ordered to show 15 most abundant PC species in each organ of *T. crocea*.

805

806 **Table S5. NMR data for GCC and polar portion of DGCC obtained in the present study**  
807 **along with those of DGCC reported [6].**

## Figures

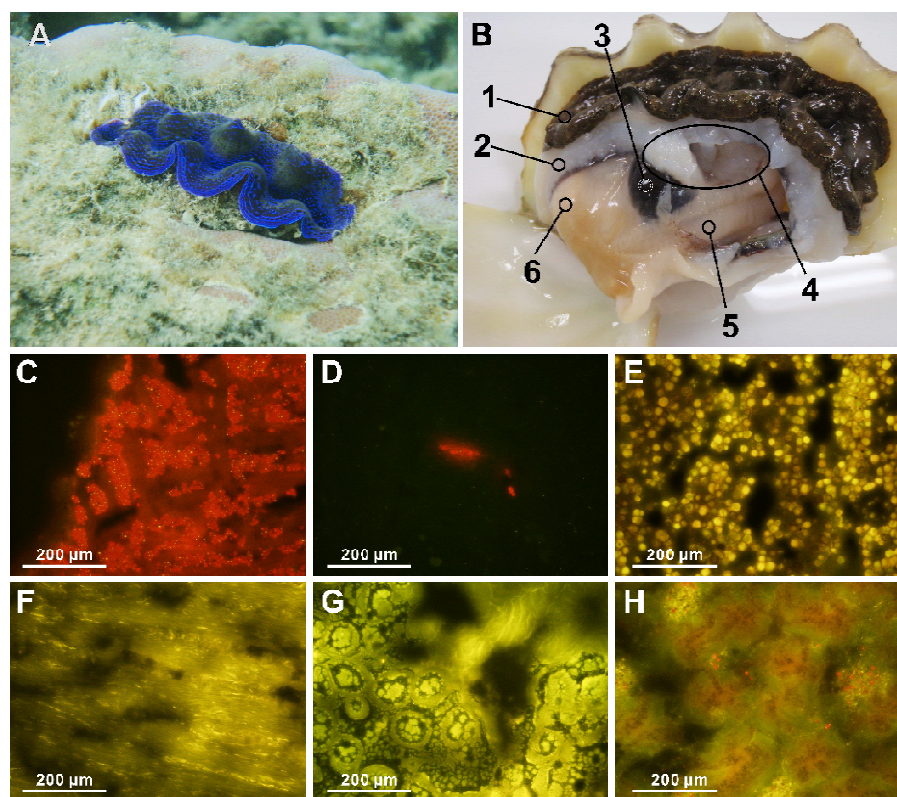

**Fig. 1.** Morphological and histological overview of *Tridacna crocea*. (A) Underwater photograph of *T. crocea* found at – 1 m, at Ishigaki, Okinawa.

(B) Dissected specimen (shell length 80.0 mm). 1; mantle (outer epidermal layer: EL), 2; mantle (inner tissue layer: IL), 3; kidney, 4; muscle (adductor muscle and posterior byssal/pedal retractor muscles), 5; ctenidia (gill), 6; gonads and digestive diverticula (DD; inside). (C–H) Fluorescence micrographs of visceral parts of *T. crocea* under blue (460–490 nm) excitation light. (C) Mantle EL, (D) Mantle IL, (E) muscle, (F) kidney, (G) gonad, (H) digestive diverticula. The red dots in fluorescence micrographs (C, D, H) indicate symbiont algal chlorophyll autofluorescence.



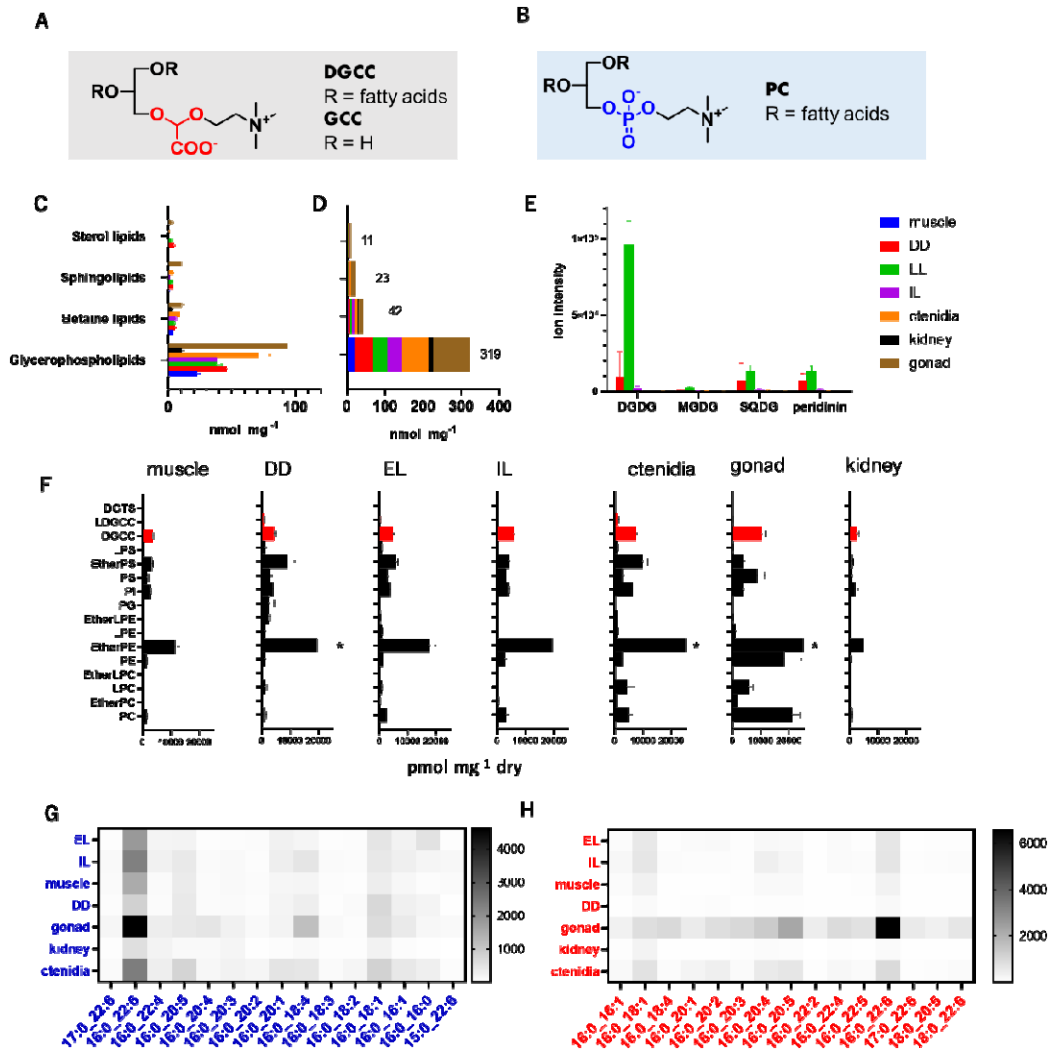

**Fig. 2.** The lipidomics overview of *T. crocea*.

Structures of (A) DGCC and (B) PC. (C) Semi-quantitative data for four representative classes of membrane-associated lipids in each organ. (D) Sum of each lipid class. Number on the histogram is the total amount in nmol. Error bars were omitted for clarity. (E) Ion intensity of galactosyl lipids and peridinol in each organ. The color label in the upper light panel is applicable to all graphs in (C–E). (F) Semi-quantitative analysis of the membrane lipids in *T. crocea*. The total amount of each class of lipids in pmol mg<sup>-1</sup> of dry tissue is shown. Glycerol phosphatidyl lipids, black bars; and betaine lipids, red bars at fixed scale. Some data for ether-PE are clipped\* in the given scale (Fig. S3). Comparisons of the 15 most abundant fatty acid species of DGCC

(G) and PC (H) in each organ of *T. crocea*. All data here were collected from 5 specimens independently (Table S3, S4). In histograms, average  $\pm$  SD were indicated.

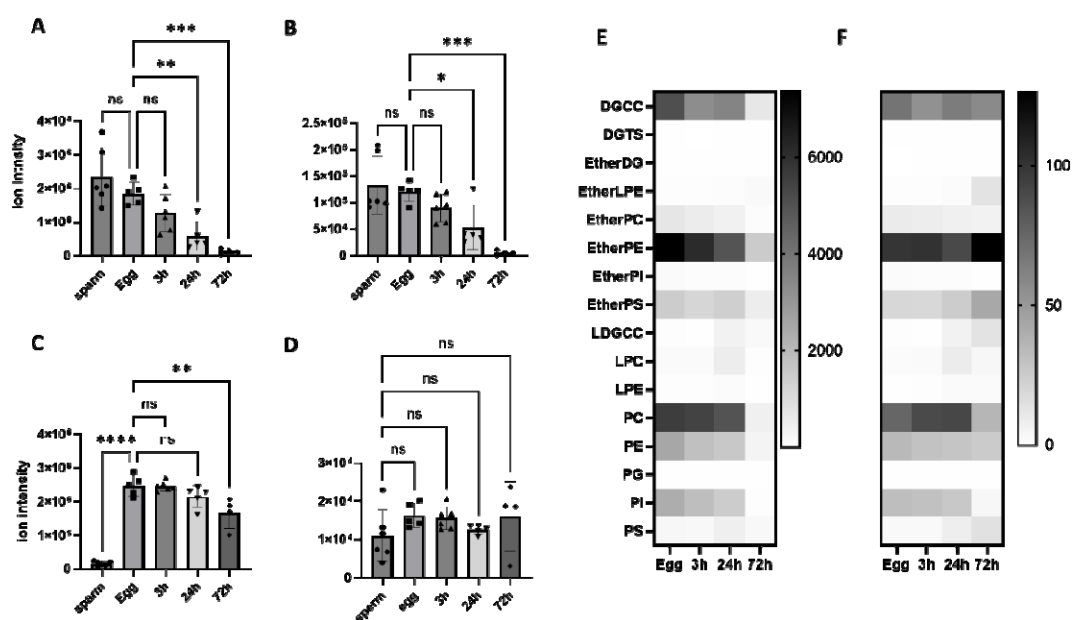

**Fig. 3.** Metabolomics profiles for eggs, sperm, and fertilized larvae of *T. crocea*. Relative abundance of (A) DGCC \*\*  $P$  value  $< 0.006$ , \*\*\*\*  $P$  value  $< 0.0006$ , ns: not significant. (B) PC, \*  $P$  value  $< 0.0215$ , \*\*\*  $P$  value  $< 0.0004$ , (C) TG, \*\*  $P$  value  $< 0.0011$ , \*\*\*\*  $P$  value  $< 0.0001$ , and (D) GCC. Each histogram indicates average value from four to six independent specimens  $\pm$  SD. One-way ANOVA followed by a Dunnett's test for multiple group comparison, ns: not significant. (E) Semi-quantitative analysis for lipid classes at each developmental stage ( $\text{pmol mg}^{-1}$ ). (F) Relative concentration of lipid in each stage. Data in each column were normalized so that the highest value becomes 100 and the lowest value is equal to 0.

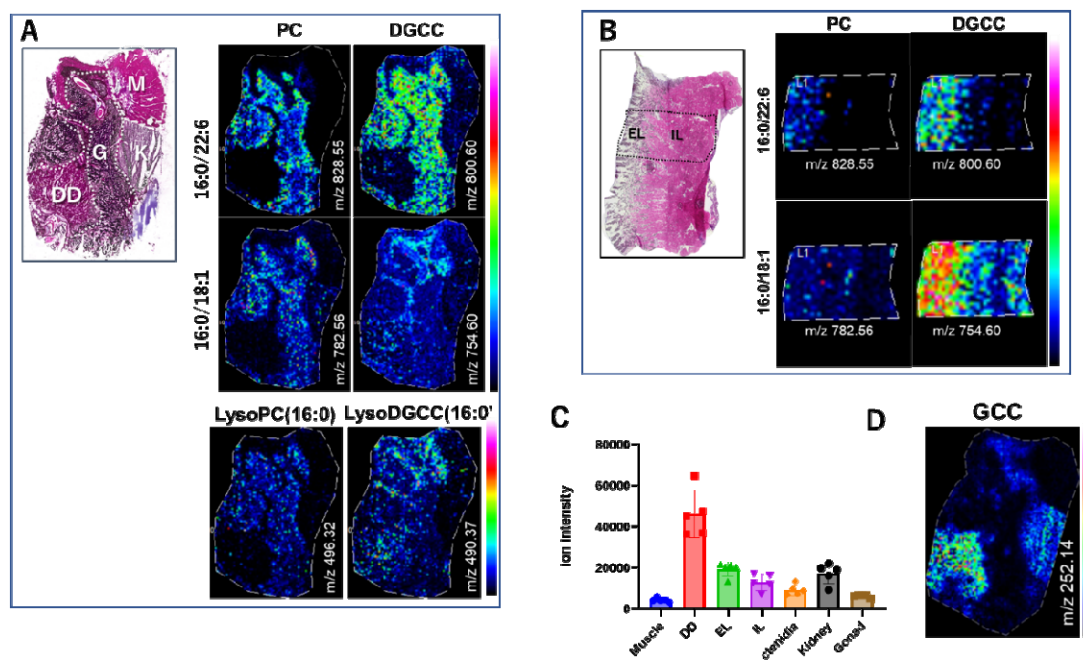

**Fig. 4.** Mass imaging data for cryosections of *T. crocea*.

(A) Atlas of the HE-stained cryo-visceral-section recovered after MS imaging. M, muscle; K, kidney; G, gonad; and DD, intestine. Heatmaps (0–100%) show relative intensities for two representative ion species (16:0/22:6) and (16:0/18:1) of PC and DGCC, and lyso-PC (16:0), and lyso-DGCC (16:0) at positive mode,  $(M + Na)^+$  for PC and  $(M + H)^+$  for DGCC. (B) HE-stained cryo-mantle-section and heatmaps. (C) LC-MS analysis of GCC in each organ. Each histogram indicates average value from four independent specimens  $\pm$ SD. Detailed result of multiple comparison is given in Fig. S14. (D) MS-imaging data for detection of GCC.

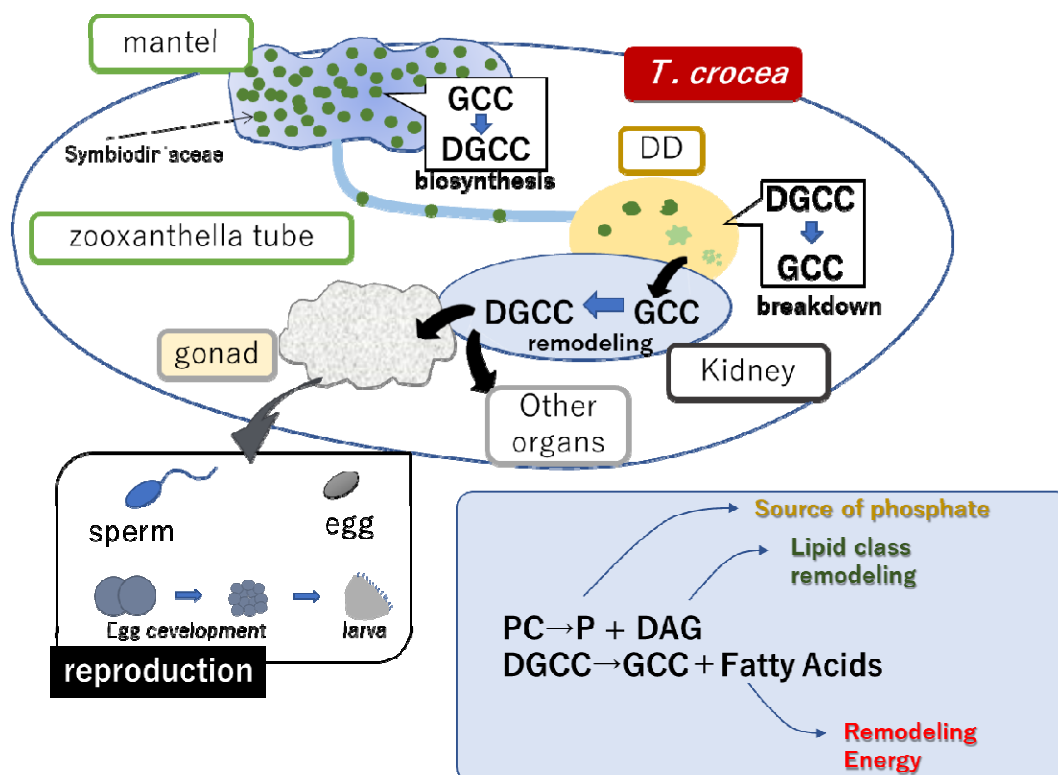

**Fig. 5.** A schematic diagram of metabolic flow in *T. crocea*. Symbiotic algae fix carbons and biosynthesize GCC followed by DGCC. The algal cells are culled, transported, and digested in DD. Algal DGCC can be hydrolyzed to form GCC, which is re-acylated to form DGCC with new acyl substituents (remodeling). Newly formed DGCC are redistributed to each organ to be incorporated in plasm membrane. In phosphorus (P) deficient conditions, the use of DGCC allows consumption of PC as an extra source of P.
